# Supplementary material
Source: Springer Nature journal article supplement (https://www.springermedizin.de/resource/supplementary/12885_2009_1949_MOESM6_ESM.pdf/9460162)
Supplement: MOESM6 [file 9460162]

## Concordance between first diagnosis and the expert review

Table 4: Diagnostic differences in cases with zero concordance

| Expert diagnosis                    | Initial diagnosis                           | Frequency<br>(n=70) |
|-------------------------------------|---------------------------------------------|---------------------|
| NOS Sarcoma                         | MPNST                                       | 1                   |
| NOS Sarcoma                         | Angiosarcoma                                | 1                   |
| NOS Sarcoma                         | Unclassified malignant tumor                | 6                   |
| NOS Sarcoma                         | Leiomyosarcoma                              | 1                   |
| NOS Sarcoma                         | GIST                                        | 1                   |
| NOS Sarcoma                         | Chondrosarcoma                              | 1                   |
| NOS Sarcoma                         | Embryonic Rhabdomyosarcoma                  | 1                   |
| NOS Sarcoma                         | Benign Tumor                                | 1                   |
| NOS Sarcoma                         | Liposarcoma                                 | 1                   |
| NOS Sarcoma                         | Leiomyosarcoma                              | 2                   |
| Leiomyosarcoma                      | Benign Tumor                                | 2                   |
| Leiomyosarcoma                      | NOS Sarcoma                                 | 1                   |
| Osteosarcoma                        | NOS Sarcoma                                 | 1                   |
| Osteosarcoma                        | Unclassified malignant tumor                | 1                   |
| Osteosarcoma                        | Melanoma                                    | 1                   |
| Lipoma-like Liposarcoma             | Benign Tumor                                | 1                   |
| Lipoma-like Liposarcoma             | Fibrosarcoma                                | 1                   |
| Lipoma-like Liposarcoma             | Unclassified malignant tumor                | 1                   |
| Liposarcoma                         | Benign Tumor                                | 1                   |
| Liposarcoma                         | NOS Sarcoma                                 | 2                   |
| Dedif. Liposarcoma                  | Leiomyosarcoma                              | 2                   |
| Dedif. Liposarcoma                  | Unclassified malignant tumor                | 1                   |
| Dedif. Liposarcoma                  | NOS Sarcoma                                 | 1                   |
| Myxofibrosarcoma                    | Liposarcoma                                 | 1                   |
| Myxofibrosarcoma                    | NOS Sarcoma                                 | 3                   |
| Myxofibrosarcoma                    | Sarcomatoid Carcinoma                       | 1                   |
| Myxofibrosarcoma                    | Chondrosarcoma                              | 1                   |
| Sarcomatoid Carcinoma               | Leiomyosarcoma                              | 1                   |
| Sarcomatoid Carcinoma               | NOS Sarcoma                                 | 3                   |
| Angiosarcoma                        | Unclassified malignant tumor                | 1                   |
| Angiosarcoma                        | Synovial sarcoma                            | 1                   |
| Benign Tumor                        | Inflammatory MyxofibroSarcoma               | 1                   |
| Benign Tumor                        | Leiomyosarcoma                              | 1                   |
| Benign Tumor                        | Well-differentiated lipoma-like Liposarcoma | 1                   |
| Epithelioid Sarcoma                 | Unclassified malignant tumor                | 1                   |
| Epithelioid Sarcoma                 | Synovial sarcoma                            | 1                   |
| PNET / Ewing sarcoma                | Carcinoma                                   | 2                   |
| PNET / Ewing sarcoma                | Unclassified malignant tumor                | 3                   |
| Rhabdomyosarcoma                    | Leiomyosarcoma                              | 1                   |
| GIST                                | NOS Sarcoma                                 | 1                   |
| Carcinoma                           | Phyllodes Tumor                             | 1                   |
| Carcinoma                           | NOS Sarcoma                                 | 1                   |
| Solitary fibrosis / malignant Tumor | GIST                                        | 1                   |
| Uterine Leiomyosarcoma              | Benign Tumor                                | 1                   |
| PEComa                              | Unclassified malignant tumor                | 1                   |
| Fibrosarcoma                        | Unclassified malignant tumor                | 1                   |
| Endometrial Stromal Sarcoma         | Leiomyosarcoma                              | 1                   |
| Epithelioid Hemangioendothelioma    | Carcinoma                                   | 1                   |
| Inflammatory Myxofibrosarcoma       | Epithelioid Sarcoma                         | 1                   |
| Unclassified malignant tumor        | Carcinoma                                   | 1                   |
| Low grade fibromyxoid Sarcoma       | Benign Tumor                                | 1                   |
| Kaposi sarcoma                      | NOS Sarcoma                                 | 1                   |
| Synovial sarcoma                    | Benign Tumor                                | 1                   |
| Dermatofibrosarcoma protuberans     | Benign Tumor                                | 1                   |

NOS: not otherwise specified

PNET: primitive neuroectodermal tumor

GIST: gastrointestinal stromal tumor

PEComa: malignant perivascular epithelioid cell tumor

MPNST: malignant peripheral nerve sheath tumor
